## Short-term risk stratification using CADILLAC risk score in patients with ST elevation myocardial infarction

T. Satou<sup>1</sup>, H. Kitahara<sup>1</sup>, K. Ishikawa<sup>2</sup>, T. Nakayama<sup>1</sup>, Y. Fujimoto<sup>1</sup>, K. Sano<sup>2</sup>, Y. Kobayashi<sup>1</sup>

<sup>1</sup> Chiba University Hospital, Chiba, Japan; <sup>2</sup> Eastern Chiba Medical Center, Cardiology, Chiba, Japan

**Funding Acknowledgement:** Type of funding source: None

**Background:** The recent reperfusion therapy for ST-elevation myocardial infarction (STEMI) has made the length of hospital stay shorter without adverse events. CADILLAC risk score is reportedly one of the risk scores predicting the long-term prognosis in STEMI patients.

**Purpose:** To investigate the usefulness of CADILLAC risk score for predicting short-term outcomes in STEMI patients.

**Methods:** Consecutive patients admitted to our university hospital and our medical center with STEMI (excluding shock, arrest case) who underwent primary PCI between January 2012 and April 2018 (n=387) were enrolled in this study. The patients were classified into 3 groups according to the CADILLAC risk score: low risk (n=176), intermediate risk (n=87), and high risk (n=124). Data on adverse events within 30 days after hospitalization, including in-hospital death, sustained ventricular arrhythmia, recurrent myocardial infarction, heart failure requiring intravenous treatment, stroke, or clinical hemorrhage, were collected.

**Results:** In the low risk group, adverse events within 30 days were significantly less observed, compared to the intermediate and high risk groups (n=13, 7.4% vs. n=13, 14.9% vs. n=58, 46.8%, p<0.001). In particular, all adverse events occurred within 3 days in the low risk group, although adverse events, such as heart failure (n=4), recurrent myocardial infarction (n=1), stroke (n=1), and gastrointestinal bleeding (n=1), were substantially observed after day 4 of hospitalization in the intermediate and high risk groups.

**Conclusions:** In STEMI patients with low CADILLAC risk score, better short-term prognosis was observed compared to the intermediate and high risk groups, and all adverse events occurred within 3 days of hospitalization, suggesting that discharge at day 4 might be safe in this study population. CADILLAC risk score may help stratify patient risk for short-term prognosis and adjust management of STEMI patients.

Comparison of adverse events between low risk and intermediate-high risk groups

|                                      | Low risk (n=176) | Intermediate-high risk (n=211) | P-value |
|--------------------------------------|------------------|--------------------------------|---------|
| Adverse event during hospitalization | 13 (7.4%)        | 71 (33.6%)                     | <0.001  |
| In-hospital death                    | 1 (0.6%)         | 7 (3.3%)                       | 0.125   |
| Sustained VT/VF                      | 4 (2.3%)         | 3 (1.4%)                       | 0.808   |
| recurrent MI                         | 1 (0.6%)         | 1 (0.5%)                       | 1.000   |
| HF requiring i.v. treatment          | 9 (5.1%)         | 61 (28.9%)                     | <0.001  |
| Stroke                               | 0 (0%)           | 1 (0.5%)                       | 1.000   |
| Clinical hemorrhage                  | 0 (0%)           | 5 (2.4%)                       | 0.109   |
| Others                               | 2 (1.1%)         | 5 (2.4%)                       | 0.601   |

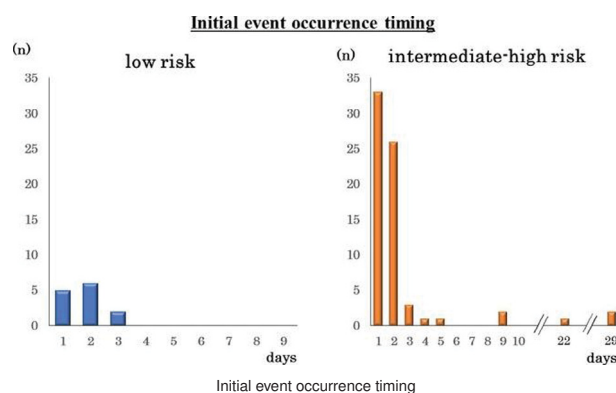

Source: http://academic.oup.com/eurheartj/article-pdf/41/Supplement_2/ehaa946.1352/34518152/ehaa946.1352.pdf
